# Supplementary material for: Identification of tetrahydrocarbazoles as novel multifactorial drug candidates for treatment of Alzheimer's disease
Source: PubMed Central journal article supplement (PMC4270312; doi:10.1038/tp.2014.132), 2014-12-16

# Figure S1

| Compound Structure and name                                                                                                                                                  | ID      | Molecular formula                                             | MW     | clogP | Calcium | TMRM  | A $\beta$ 42 | A $\beta$ 40 | A $\beta$ 38 |
|------------------------------------------------------------------------------------------------------------------------------------------------------------------------------|---------|---------------------------------------------------------------|--------|-------|---------|-------|--------------|--------------|--------------|
| 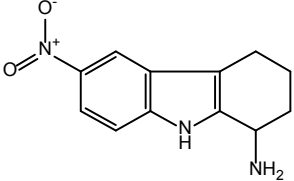 <p>6-nitro-2,3,4,9-tetrahydro-1H-carbazol-1-amine</p>                                      | 5302860 | C <sub>12</sub> H <sub>13</sub> N <sub>3</sub> O <sub>2</sub> | 231.25 | 2.16  | 1.038   | 0.622 | 0.473        | 0.494        | 0.421        |
|  <p>N-(6-nitro-2,3,4,9-tetrahydro-1H-carbazol-1-yl)formamide</p>                            | 5373790 | C <sub>13</sub> H <sub>23</sub> N <sub>3</sub> O <sub>3</sub> | 259.26 | 1.86  | 0.944   | 0.656 | 0.988        | 0.875        | 0.981        |
|  <p>N-(4-ethylcyclohexyl)-6-nitro-2,3,4,9-tetrahydro-1H-carbazol-1-amine</p>                | 5781439 | C <sub>20</sub> H <sub>27</sub> N <sub>3</sub> O <sub>2</sub> | 341.45 | 5.65  | 0.981   | 1.384 | 1.058        | 0.733        | 0.584        |
|  <p>N-(3-methylcyclohexyl)-6-nitro-2,3,4,9-tetrahydro-1H-carbazol-1-amine</p>              | 5781448 | C <sub>19</sub> H <sub>25</sub> N <sub>3</sub> O <sub>2</sub> | 327.42 | 5.13  | 0.966   | 1.545 | 0.593        | 0.726        | 0.593        |
|  <p>6-nitro-N-(4-phenylcyclohexyl)-2,3,4,9-tetrahydro-1H-carbazol-1-amine</p>             | 5781451 | C <sub>24</sub> H <sub>27</sub> N <sub>3</sub> O <sub>2</sub> | 389.49 | 6.01  | 0.967   | 1.180 | 1.093        | 0.777        | 0.648        |
|  <p>N-(1-(4-methoxyphenyl)propan-2-yl)-6-nitro-2,3,4,9-tetrahydro-1H-carbazol-1-amine</p> | 5781452 | C <sub>22</sub> H <sub>25</sub> N <sub>3</sub> O <sub>3</sub> | 379.45 | 4.90  | 0.952   | 2.118 | 0.961        | 0.564        | 0.609        |
|  <p>N-(1-ethylpiperidin-4-yl)-6-nitro-2,3,4,9-tetrahydro-1H-carbazol-1-amine</p>          | 5781457 | C <sub>19</sub> H <sub>26</sub> N <sub>4</sub> O <sub>2</sub> | 342.44 | 3.16  | 0.789   | 1.926 | 0.702        | 0.503        | 0.623        |
|  <p>6-nitro-N-(1-propylpiperidin-4-yl)-2,3,4,9-tetrahydro-1H-carbazol-1-amine</p>         | 5781458 | C <sub>20</sub> H <sub>28</sub> N <sub>4</sub> O <sub>2</sub> | 356.46 | 3.69  | 0.962   | 1.756 | 0.683        | 0.503        | 0.618        |

| Compound Structure and name                                                                                                                                               | ID      | Molecular formula                                             | MW     | clogP | Calcium | TMRM  | A $\beta$ 42 | A $\beta$ 40 | A $\beta$ 38 |
|---------------------------------------------------------------------------------------------------------------------------------------------------------------------------|---------|---------------------------------------------------------------|--------|-------|---------|-------|--------------|--------------|--------------|
| 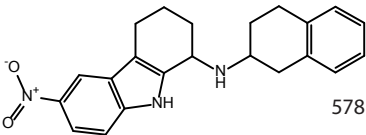<br>6-nitro-N-(1,2,3,4-tetrahydronaphthalen-2-yl)-2,3,4,9-tetrahydro-1H-carbazol-1-amine | 5781459 | C <sub>22</sub> H <sub>23</sub> N <sub>3</sub> O <sub>2</sub> | 361.44 | 5.12  | 0.979   | 1.551 | 0.980        | 0.652        | 0.812        |
| <br>2-methoxy-4-(2-((6-nitro-2,3,4,9-tetrahydro-1H-carbazol-1-yl)amino)propyl)phenol     | 5781461 | C <sub>22</sub> H <sub>25</sub> N <sub>3</sub> O <sub>4</sub> | 395.45 | 4.16  | 1.030   | 1.499 | 0.875        | 0.718        | 0.794        |
| <br>6-nitro-N-(4-phenylbutan-2-yl)-2,3,4,9-tetrahydro-1H-carbazol-1-amine                | 5781463 | C <sub>22</sub> H <sub>25</sub> N <sub>3</sub> O <sub>2</sub> | 363.45 | 5.36  | 0.982   | 1.128 | 1.126        | 0.853        | 0.807        |
| <br>N-(1-benzylpiperidin-4-yl)-6-nitro-2,3,4,9-tetrahydro-1H-carbazol-1-amine           | 5781464 | C <sub>24</sub> H <sub>28</sub> N <sub>4</sub> O <sub>2</sub> | 404.50 | 4.42  | 0.895   | 3.256 | 0.575        | 0.539        | 0.486        |
| <br>N-(4-(tert-butyl)cyclohexyl)-6-nitro-2,3,4,9-tetrahydro-1H-carbazol-1-amine        | 5781465 | C <sub>22</sub> H <sub>31</sub> N <sub>3</sub> O <sub>2</sub> | 369.50 | 6.45  | 0.959   | 1.157 | 0.891        | 0.747        | 0.585        |
| <br>N-cycloheptyl-6-nitro-2,3,4,9-tetrahydro-1H-carbazol-1-amine                       | 5781467 | C <sub>22</sub> H <sub>31</sub> N <sub>3</sub> O <sub>2</sub> | 327.42 | 5.17  | 0.923   | 0.959 | 1.007        | 0.785        | 0.609        |
| <br>N-(4-(4-methoxyphenyl)butan-2-yl)-6-nitro-2,3,4,9-tetrahydro-1H-carbazol-1-amine   | 5781468 | C <sub>23</sub> H <sub>27</sub> N <sub>3</sub> O <sub>3</sub> | 393.48 | 5.28  | 0.936   | 1.476 | 1.000        | 0.868        | 0.668        |
| <br>N-(bicyclo[2.2.1]heptan-2-yl)-6-nitro-2,3,4,9-tetrahydro-1H-carbazol-1-amine       | 5781469 | C <sub>19</sub> H <sub>23</sub> N <sub>3</sub> O <sub>2</sub> | 325.40 | 4.89  | 0.942   | 0.892 | 1.068        | 0.596        | 0.628        |

| Compound Structure and name                                                                                                                                                    | ID      | Molecular formula                                              | MW     | clogP | Calcium | TMRM  | Aβ 42 | Aβ 40 | Aβ 38 |
|--------------------------------------------------------------------------------------------------------------------------------------------------------------------------------|---------|----------------------------------------------------------------|--------|-------|---------|-------|-------|-------|-------|
| 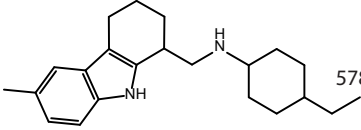 <p>4-ethyl-N-((6-methyl-2,3,4,9-tetrahydro-1H-carbazol-1-yl)methyl)cyclohexanamine</p>       | 5781474 | C <sub>22</sub> H <sub>32</sub> N <sub>2</sub>                 | 324.50 | 6.21  | 0.437   | 0.641 | 1.471 | 0.769 | 0.815 |
|  <p>1-methyl-N-((6-methyl-2,3,4,9-tetrahydro-1H-carbazol-1-yl)methyl)piperidin-4-amine</p>    | 5781475 | C <sub>20</sub> H <sub>29</sub> N <sub>3</sub>                 | 311.46 | 3.19  | 0.499   | 1.259 | 1.068 | 0.753 | 0.916 |
|  <p>N-(1-(3,4-dimethoxyphenyl)propan-2-yl)-6-nitro-2,3,4,9-tetrahydro-1H-carbazol-1-amine</p> | 5781442 | C <sub>23</sub> H <sub>27</sub> N <sub>3</sub> O <sub>4</sub>  | 409.48 | 4.64  | 0.961   | 1.329 | 1.053 | 0.692 | 0.772 |
|  <p>N-isopropyl-6-nitro-2,3,4,9-tetrahydro-1H-carbazol-1-amine</p>                          | 5781470 | C <sub>15</sub> H <sub>19</sub> N <sub>3</sub> O <sub>2</sub>  | 273.33 | 3.41  | 0.942   | 0.850 | 0.760 | 0.545 | 0.582 |
|  <p>N-(4-methylcyclohexyl)-6-nitro-2,3,4,9-tetrahydro-1H-carbazol-1-amine</p>               | 5781447 | C <sub>19</sub> H <sub>25</sub> N <sub>3</sub> O <sub>2</sub>  | 327.42 | 5.13  | 0.942   | 0.491 | 0.983 | 0.827 | 0.735 |
|  <p>N-(1-(2-methoxyphenyl)propan-2-yl)-6-nitro-2,3,4,9-tetrahydro-1H-carbazol-1-amine</p>   | 5781453 | C <sub>22</sub> H <sub>25</sub> N <sub>3</sub> O <sub>3</sub>  | 379.45 | 4.90  | 0.917   | 0.554 | 0.896 | 0.779 | 0.850 |
|  <p>N-(1-(2-fluorophenyl)propan-2-yl)-6-nitro-2,3,4,9-tetrahydro-1H-carbazol-1-amine</p>    | 5781454 | C <sub>21</sub> H <sub>22</sub> FN <sub>3</sub> O <sub>2</sub> | 367.42 | 5.12  | 0.925   | 0.433 | 0.846 | 0.706 | 0.692 |
|  <p>6-nitro-N-(1-phenethyl)piperidin-4-yl)-2,3,4,9-tetrahydro-1H-carbazol-1-amine</p>       | 5781441 | C <sub>25</sub> H <sub>30</sub> N <sub>4</sub> O <sub>2</sub>  | 418.53 | 4.56  | 0.914   | 2.357 | 0.566 | 0.531 | 0.523 |

| Compound Structure and name                                                                                                                                                 | ID      | Molecular formula                                             | MW     | clogP | Calcium | TMRM  | Aβ 42 | Aβ 40 | Aβ 38 |
|-----------------------------------------------------------------------------------------------------------------------------------------------------------------------------|---------|---------------------------------------------------------------|--------|-------|---------|-------|-------|-------|-------|
| 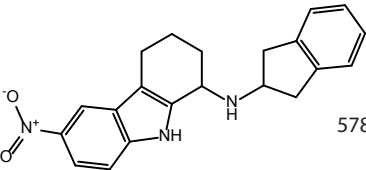 <p>N-(2,3-dihydro-1H-inden-2-yl)-6-nitro-2,3,4,9-tetrahydro-1H-carbazol-1-amine</p>       | 5781444 | C <sub>21</sub> H <sub>21</sub> N <sub>3</sub> O <sub>2</sub> | 347.41 | 4.56  | 0.917   | 1.046 | 0.785 | 0.769 | 0.857 |
|  <p>1-methyl-N-((6-methyl-2,3,4,9-tetrahydro-1H-carbazol-1-yl)methyl)piperidin-4-amine</p> | 5781446 | C <sub>18</sub> H <sub>23</sub> N <sub>3</sub> O <sub>2</sub> | 313.39 | 4.57  | 0.933   | 1.259 | 1.038 | 0.593 | 0.594 |
|  <p>2-((6-bromo-2,3,4,9-tetrahydro-1H-carbazol-1-yl)amino)ethanol</p>                      | 5258947 | C <sub>14</sub> H <sub>17</sub> BrN <sub>2</sub> O            | 309.20 | 2.91  | 1.047   | 1.514 | 0.335 | 0.355 | 0.317 |
|  <p>6-bromo-N-phenethyl-2,3,4,9-tetrahydro-1H-carbazol-1-amine hydrochloride</p>          | 5265927 | C <sub>20</sub> H <sub>22</sub> BrClN <sub>2</sub>            | 405.76 | 5.60  | 0.791   | 1.922 | 0.292 | 0.278 | 0.176 |
|  <p>N-benzyl-6-bromo-2,3,4,9-tetrahydro-1H-carbazol-1-amine</p>                          | 5307331 | C <sub>19</sub> H <sub>19</sub> BrN <sub>2</sub>              | 355.27 | 4.66  | 0.703   | 1.508 | 0.683 | 0.503 | 0.357 |
|  <p>3-benzyl-8-bromo-2,3,3a,4,5,6-hexahydro-1H-pyrazino[3,2,1-jk]carbazole</p>           | 5358447 | C <sub>21</sub> H <sub>21</sub> BrN <sub>2</sub>              | 381.31 | 6.11  | 0.953   | 1.008 | 0.332 | 0.397 | 0.421 |
|  <p>6-bromo-1-(1H-pyrrol-1-yl)-2,3,4,9-tetrahydro-1H-carbazole</p>                       | 5920301 | C <sub>16</sub> H <sub>15</sub> BrN <sub>2</sub>              | 315.21 | 4.98  | 0.869   | 0.831 | 0.492 | 0.481 | 0.449 |
|  <p>N-(6-bromo-2,3,4,9-tetrahydro-1H-carbazol-1-yl)formamide</p>                         | 5922537 | C <sub>13</sub> H <sub>13</sub> BrN <sub>2</sub> O            | 293.16 | 2.79  | 1.002   | 1.207 | 1.056 | 0.712 | 0.874 |

| Compound Structure and name                                                                                                                                                  | ID      | Molecular formula                                               | MW     | clogP | Calcium | TMRM  | Aβ 42 | Aβ 40 | Aβ 38 |
|------------------------------------------------------------------------------------------------------------------------------------------------------------------------------|---------|-----------------------------------------------------------------|--------|-------|---------|-------|-------|-------|-------|
| 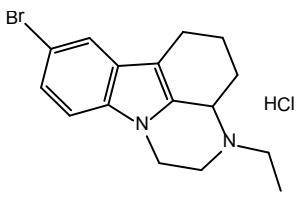 <p>8-bromo-3-ethyl-2,3,3a,4,5,6-hexahydro-1H-pyrazino[3,2,1-jk]carbazole hydrochloride</p> | 6044730 | C <sub>16</sub> H <sub>20</sub> BrClN <sub>2</sub>              | 355.70 | 4.72  | 0.968   | 0.745 | 1.180 | 0.745 | 1.003 |
|  <p>8-bromo-3-propyl-2,3,3a,4,5,6-hexahydro-1H-pyrazino[3,2,1-jk]carbazole</p>              | 6049723 | C <sub>17</sub> H <sub>21</sub> BrN <sub>2</sub>                | 333.27 | 5.25  | 0.961   | 0.663 | 0.840 | 0.642 | 0.817 |
|  <p>6-bromo-2,3,4,9-tetrahydro-1H-carbazol-1-amine</p>                                      | 5303801 | C <sub>12</sub> H <sub>13</sub> BrN <sub>2</sub>                | 265.15 | 3.09  | 0.989   | 1.116 | 0.269 | 0.271 | 0.309 |
|  <p>N-(6-fluoro-2,3,4,9-tetrahydro-1H-carbazol-1-yl)formamide</p>                          | 7129409 | C <sub>13</sub> H <sub>13</sub> FN <sub>2</sub> O               | 232.25 | 2.07  | 0.958   | 0.860 | 0.592 | 0.470 | 0.589 |
|  <p>N-(6-(trifluoromethyl)-2,3,4,9-tetrahydro-1H-carbazol-1-yl)formamide</p>              | 5922756 | C <sub>14</sub> H <sub>13</sub> F <sub>3</sub> N <sub>2</sub> O | 282.26 | 2.93  | 1.001   | 1.236 | 0.999 | 1.033 | 1.057 |
|  <p>N-(6-(benzyloxy)-2,3,4,9-tetrahydro-1H-carbazol-1-yl)formamide</p>                    | 7173317 | C <sub>20</sub> H <sub>20</sub> N <sub>2</sub> O <sub>2</sub>   | 320.38 | 3.55  | 0.998   | 0.606 | 1.012 | 0.997 | 1.104 |

# Figure S2

| Compound Structure and name                                                                                                                                       | ID         | Molecular formula                                              | MW     | clogP | Calcium | TMRM  | Aβ 42 | Aβ 40 | Aβ 38 |
|-------------------------------------------------------------------------------------------------------------------------------------------------------------------|------------|----------------------------------------------------------------|--------|-------|---------|-------|-------|-------|-------|
| 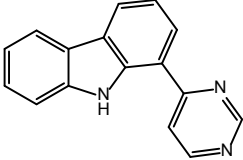 <p>1-(pyrimidin-4-yl)-9H-carbazole</p>                                          | gea_82     | C <sub>16</sub> H <sub>11</sub> N <sub>3</sub>                 | 245.28 | 3.16  | 0.974   | 0.926 | 1.080 | 1.086 | 1.164 |
|  <p>N-benzyl-2,3,4,9-tetrahydro-1H-carbazol-1-aminium chloride</p>               | gea_83     | C <sub>19</sub> H <sub>28</sub> ClN <sub>2</sub>               | 312.84 | 4.63  | 0.991   | 1.219 | 1.050 | 0.835 | 0.635 |
|  <p>N-benzyl-7,8-dichloro-2,3,4,9-tetrahydro-1H-carbazol-1-aminium chloride</p>  | gea_84     | C <sub>19</sub> H <sub>19</sub> Cl <sub>2</sub> N <sub>2</sub> | 381.73 | 6.16  | 1.011   | 1.049 | 1.100 | 1.050 | 0.913 |
|  <p>N-benzyl-6-bromo-2,3,4,9-tetrahydro-1H-carbazol-1-aminium chloride</p>      | gea_85     | C <sub>19</sub> H <sub>20</sub> BrClN <sub>2</sub>             | 391.73 | 5.66  | 0.879   | 1.444 | 0.910 | 0.765 | 0.651 |
|  <p>N-benzyl-6-iodo-2,3,4,9-tetrahydro-1H-carbazol-1-aminium chloride</p>      | gea_86     | C <sub>19</sub> H <sub>20</sub> ClIN <sub>2</sub>              | 438.73 | 5.92  | 0.913   | 1.444 | 0.901 | 0.767 | 0.629 |
|  <p>6-bromo-N-cyclohexyl-2,3,4,9-tetrahydro-1H-carbazol-1-amine</p>            | gea_87     | C <sub>18</sub> H <sub>23</sub> BrN <sub>2</sub>               | 347.29 | 5.53  | 0.946   | 0.998 | 0.779 | 0.564 | 0.479 |
|  <p>6-bromo-N-cyclohexyl-2,3,4,9-tetrahydro-1H-carbazol-1-aminium chloride</p> | gea_87_HCl | C <sub>18</sub> H <sub>24</sub> BrClN <sub>2</sub>             | 383.75 | 6.01  | 0.914   | 0.926 | 0.848 | 0.608 | 0.610 |
|  <p>2,2,9-trimethyl-2,3,4,9-tetrahydro-1H-carbazol-1-one</p>                   | gea_88     | C <sub>15</sub> H <sub>17</sub> NO                             | 227.30 | 3.80  | 0.977   | 0.814 | 1.218 | 0.850 | 1.013 |

| Compound Structure and name                                                                                                                                          | ID     | Molecular formula                                  | MW     | clogP | Calcium | TMRM  | Aβ 42 | Aβ 40 | Aβ 38 |
|----------------------------------------------------------------------------------------------------------------------------------------------------------------------|--------|----------------------------------------------------|--------|-------|---------|-------|-------|-------|-------|
| 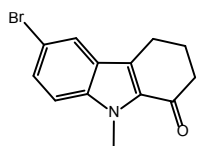 <p>6-bromo-9-methyl-2,3,4,9-tetrahydro-1H-carbazol-1-one</p>                       | gea_89 | C <sub>13</sub> H <sub>12</sub> BrNO               | 278.14 | 3.65  | 0.947   | 0.858 | 0.956 | 0.772 | 0.948 |
|  <p>N-benzyl-6-bromo-9-methyl-2,3,4,9-tetrahydro-1H-carbazol-1-amine</p>            | gea_90 | C <sub>20</sub> H <sub>21</sub> BrN <sub>2</sub>   | 369.30 | 5.00  | 0.972   | 1.024 | 0.891 | 0.806 | 0.892 |
|  <p>N-benzyl-6-bromo-N-methyl-2,3,4,9-tetrahydro-1H-carbazol-1-amine</p>            | gea_92 | C <sub>20</sub> H <sub>21</sub> BrN <sub>2</sub>   | 369.30 | 5.74  | 1.000   | 0.724 | 0.815 | 0.754 | 0.745 |
|  <p>4H-pyrido[3,2,1-jk]carbazol-4-one</p>                                          | gea_94 | C <sub>15</sub> H <sub>9</sub> NO                  | 219.24 | 1.96  | 0.960   | 0.716 | 1.075 | 1.110 | 1.019 |
|  <p>5-iodo-4H-pyrido[3,2,1-jk]carbazol-4-one</p>                                  | gea_95 | C <sub>15</sub> H <sub>8</sub> INO                 | 345.13 | 3.09  | 0.974   | 0.926 | 1.031 | 0.993 | 0.991 |
|  <p>N-(1-benzylpiperidin-4-yl)-6-iodo-2,3,4,9-tetrahydro-1H-carbazol-1-amine</p>  | gea_96 | C <sub>24</sub> H <sub>28</sub> IN <sub>3</sub>    | 485.40 | 5.61  | 0.840   | 2.100 | 0.542 | 0.520 | 0.461 |
|  <p>N-(1-benzylpiperidin-4-yl)-6-bromo-2,3,4,9-tetrahydro-1H-carbazol-1-amine</p> | gea_97 | C <sub>24</sub> H <sub>28</sub> BrN <sub>3</sub>   | 438.40 | 5.35  | 0.894   | 2.335 | 0.530 | 0.552 | 0.487 |
|  <p>6-bromo-2,3,4,9-tetrahydro-1H-carbazol-1-aminium</p>                          | gea_99 | C <sub>12</sub> H <sub>14</sub> BrClN <sub>2</sub> | 301.61 | 3.14  | 0.997   | 1.563 | 0.506 | 0.489 | 0.586 |





Figure S3

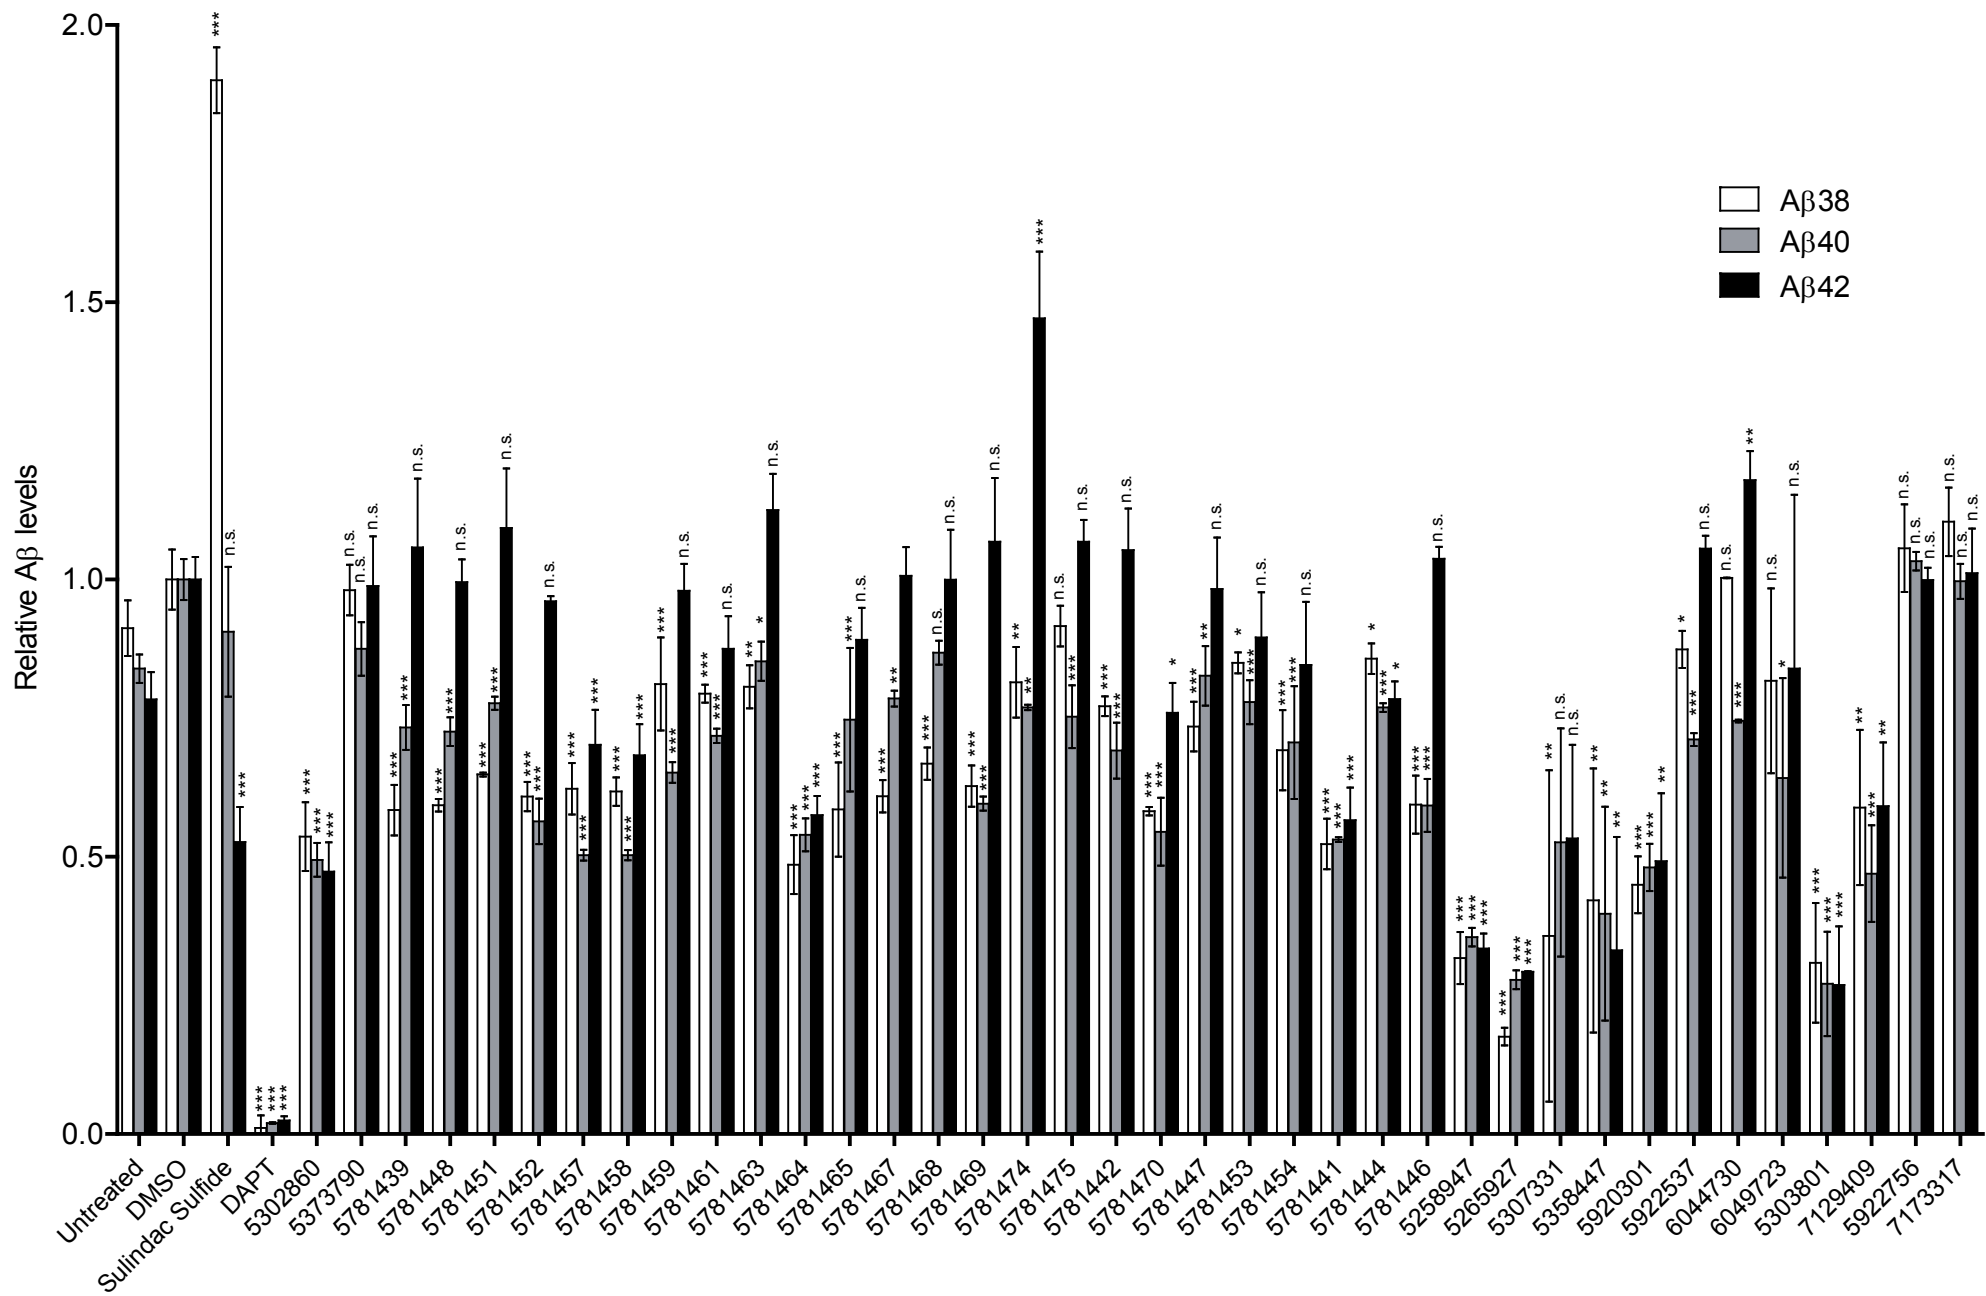

Figure S4

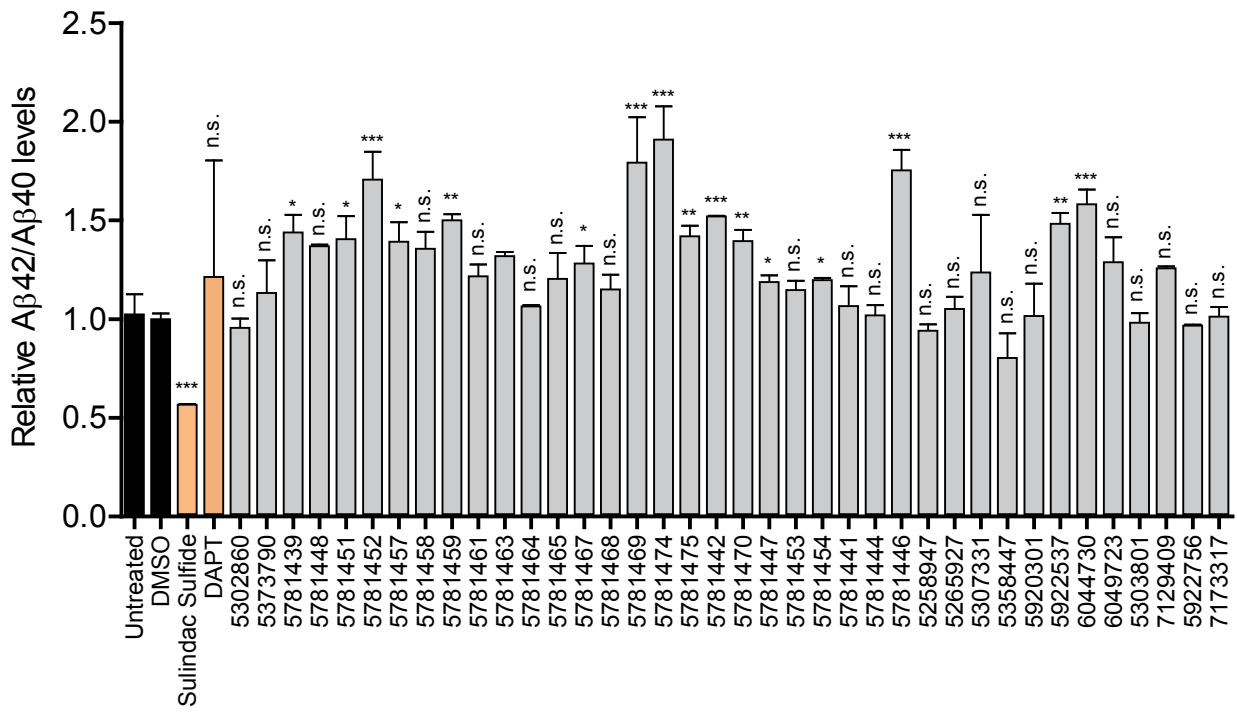

Supplement: tp2014132x1.pdf [file tp2014132x1.pdf]
